# Supplementary material
Source: HighWire-hosted journal article supplement (https://www.annfammed.org/content/suppl/2019/05/13/17.3.221)
Supplement: Etz_Supp_App.pdf [file Etz_Supp_App.pdf]

**Supplemental materials for:**

Etz RS, Zyzanski SJ, Gonzalez MM, Reves SR, O'Neal JP, Stange KC. A New Comprehensive Measure of High-Value Aspects of Primary Care. *Ann Fam Med*. 2019;17(3):221-230.

## Supplementary Appendix: Table of Contents

### Appendix A Items and response categories for the Person-Centered Primary Care Measure

#### Appendix B – in order of appearance

|            |                                                                                                                                                 |
|------------|-------------------------------------------------------------------------------------------------------------------------------------------------|
| Table 1B.  | Online sample 1 participant characteristics                                                                                                     |
| Table 2B.  | Items, descriptions, factor loading and goodness of fit statistic for online sample 1                                                           |
| Table 3B.  | Items, Rasch item measures and standard error, item-total correlations, outfit mean squares and standardized fit statistics for online sample 2 |
| Table 4B.  | Concurrent validity analyses for online sample 1                                                                                                |
| Figure 1B. | Scree test for online (cross-validation) sample 2                                                                                               |
| Figure 2B. | Distribution of scores in online sample 1                                                                                                       |
| Figure 3B. | Rasch Model item-person map for online sample 1                                                                                                 |
| Table 5B.  | Participant characteristics for each of three clinical sub-samples                                                                              |
| Table 6B.  | Items, descriptions, factor loading and goodness of fit statistic for clinical sub-samples                                                      |
| Table 7B.  | Concurrent validity analyses for clinical sub-samples                                                                                           |
| Figure 4B. | Distribution of scores in two private practices                                                                                                 |
| Figure 5B. | Distribution of scores in community health center                                                                                               |
| Figure 6B. | Distribution of scores in pediatric practice                                                                                                    |
| Figure 7B. | Rasch Model item-person map in two private practices                                                                                            |
| Figure 8B. | Rasch Model in community health center                                                                                                          |
| Figure 9B. | Rasch Model in pediatric practice                                                                                                               |

## Appendix A: Items and response categories for the Person-Centered Primary Care Measure

| For each item, choose the response that best fits your experience:              | Response                              |
|---------------------------------------------------------------------------------|---------------------------------------|
| The practice makes it easy for me to get care.                                  | Definitely Mostly Somewhat Not at all |
| This practice is able to provide most of my care.                               | Definitely Mostly Somewhat Not at all |
| In caring for me, my doctor considers all of the factors that affect my health. | Definitely Mostly Somewhat Not at all |
| My practice coordinates the care I get from multiple places.                    | Definitely Mostly Somewhat Not at all |
| This doctor or practice knows me as a person.                                   | Definitely Mostly Somewhat Not at all |
| My doctor and I have been through a lot together                                | Definitely Mostly Somewhat Not at all |
| My doctor or practice stands up for me.                                         | Definitely Mostly Somewhat Not at all |
| The care I get takes into account knowledge of my family.                       | Definitely Mostly Somewhat Not at all |
| The care I get in this practice is informed by knowledge of my community.       | Definitely Mostly Somewhat Not at all |
| Over time, this practice helps me to meet my goals.                             | Definitely Mostly Somewhat Not at all |
| Over time, my practice helps me stay healthy.                                   | Definitely Mostly Somewhat Not at all |

## Appendix B

**Table 1B. Online sample 1 participant characteristics**

| Participant Characteristic      | Online Sample 1*<br>N= 1140 |            |
|---------------------------------|-----------------------------|------------|
| Age                             | <u>N</u>                    | <u>(%)</u> |
| 18-29                           | 179                         | (17)       |
| 30-44                           | 296                         | (29)       |
| 45-60                           | 249                         | (24)       |
| > 60                            | 314                         | (30)       |
| Gender (Female)                 | 555                         | (54)       |
| Self-identify as minority (Yes) | 222                         | (20)       |
| Region                          |                             |            |
| Northeast                       | 221                         | (21)       |
| Midwest                         | 285                         | (28)       |
| South                           | 306                         | (30)       |
| West                            | 213                         | (21)       |
| Single physician for care (Yes) | 907                         | (83)       |
| Years knowing physician         |                             |            |
| <1                              | 75                          | (7)        |
| 1-3                             | 371                         | (33)       |
| 4-10                            | 341                         | (31)       |
| >10                             | 320                         | (29)       |
| Device used (Desktop/laptop)    | 689                         | (66)       |
| Patient Enablement Index        |                             |            |
| 0                               | 230                         | (21)       |
| 1-5                             | 288                         | (26)       |
| 6-11                            | 395                         | (35)       |
| 12                              | 197                         | (18)       |

**Table 2B: Items, descriptions, factor loading and goodness of fit statistic for online sample 1**

| Item                                                                            | Online Sample1* |      |                |                        |
|---------------------------------------------------------------------------------|-----------------|------|----------------|------------------------|
|                                                                                 | Mean            | S.D. | Factor Loading | Item-Total Correlation |
| My practice makes it easy for me to get care.                                   | 3.13            | 0.85 | 0.70           | 0.67                   |
| My practice is able to provide most of my care.                                 | 3.11            | 0.84 | 0.70           | 0.66                   |
| In caring for me, my doctor considers all of the factors that affect my health. | 3.24            | 0.85 | 0.80           | 0.76                   |
| My practice coordinates the care I get from multiple places.                    | 2.83            | 1.01 | 0.64           | 0.62                   |
| My doctor or practice knows me as a person.                                     | 2.93            | 1.06 | 0.83           | 0.81                   |
| My doctor and I have been through a lot together.                               | 2.26            | 1.16 | 0.66           | 0.64                   |
| My doctor or practice stands up for me.                                         | 2.74            | 1.01 | 0.85           | 0.83                   |
| The care I get takes into account knowledge of my family.                       | 2.69            | 1.09 | 0.80           | 0.78                   |
| The care I get in this practice is informed by knowledge of my community.       | 2.30            | 1.06 | 0.71           | 0.70                   |
| Over time, this practice helps me to meet my goals.                             | 3.03            | 0.91 | 0.85           | 0.82                   |
| Over time, my practice helps me stay healthy.                                   | 2.84            | 0.96 | 0.85           | 0.81                   |

**Table 3B: Items, Rasch item measures and standard error, item-total correlations, outfit mean squares and standardized fit statistics for online sample 2 (n= 1089)**

| Item                                                                            | Item Measure | S.E. | Corrected Item Total Correlation | Outfit Mean Square | ZSTD |
|---------------------------------------------------------------------------------|--------------|------|----------------------------------|--------------------|------|
| My practice makes it easy for me to get care.                                   | -0.86        | 0.05 | 0.71                             | 1.18               | 2.6  |
| My practice is able to provide most of my care.                                 | -0.73        | 0.05 | 0.71                             | 1.33               | 4.8  |
| In caring for me, my doctor considers all of the factors that affect my health. | -1.05        | 0.05 | 0.82                             | 0.65               | 5.7  |
| My practice coordinates the care I get from multiple places.                    | -0.12        | 0.05 | 0.74                             | 1.15               | 2.7  |
| My doctor or practice knows me as a person.                                     | -0.06        | 0.05 | 0.82                             | 0.86               | 2.7  |
| My doctor and I have been through a lot together.                               | 1.74         | 0.05 | 0.66                             | 1.44               | 7.0  |
| My doctor or practice stands up for me.                                         | 0.16         | 0.05 | 0.83                             | 0.73               | 5.9  |
| The care I get takes into account knowledge of my family.                       | 0.40         | 0.05 | 0.77                             | 1.03               | 0.7  |
| The care I get in this practice is informed by knowledge of my community.       | 1.08         | 0.05 | 0.70                             | 1.36               | 6.6  |
| Over time, this practice helps me to meet my goals.                             | -0.54        | 0.05 | 0.84                             | 0.62               | 7.5  |
| Over time, my practice helps me stay healthy.                                   | -0.02        | 0.05 | 0.82                             | 0.79               | 4.3  |

**Table 4B: Concurrent validity analyses for online sample 1**

| Validation Item                                                                                                                    | Online Sample 1* |      |      |       |
|------------------------------------------------------------------------------------------------------------------------------------|------------------|------|------|-------|
|                                                                                                                                    | N                | Mean | S.D. | P     |
| Age                                                                                                                                |                  |      |      |       |
| 18-29                                                                                                                              | 179              | 2.68 | 0.79 | .0001 |
| 30-44                                                                                                                              | 296              | 2.66 | 0.80 |       |
| 45-60                                                                                                                              | 249              | 2.90 | 0.74 |       |
| > 60                                                                                                                               | 314              | 3.01 | 0.72 |       |
| Female                                                                                                                             |                  |      |      |       |
| Yes                                                                                                                                | 555              | 2.80 | 0.78 | .39   |
| No                                                                                                                                 | 483              | 2.84 | 0.77 |       |
| Self-identify as minority                                                                                                          |                  |      |      |       |
| Yes                                                                                                                                | 222              | 2.82 | 0.77 | .89   |
| No                                                                                                                                 | 876              | 2.83 | 0.77 |       |
| Single physician for care                                                                                                          |                  |      |      |       |
| Yes                                                                                                                                | 907              | 2.93 | 0.71 | .0001 |
| No                                                                                                                                 | 191              | 2.35 | 0.84 |       |
| Years knowing physician                                                                                                            |                  |      |      |       |
| <1                                                                                                                                 | 75               | 2.36 | 0.85 | .0001 |
| 1-3                                                                                                                                | 371              | 2.63 | 0.71 |       |
| 4-10                                                                                                                               | 341              | 2.93 | 0.71 |       |
| >10                                                                                                                                | 320              | 3.16 | 0.66 |       |
| Device used                                                                                                                        |                  |      |      |       |
| Desktop/Laptop                                                                                                                     | 689              | 2.80 | 0.76 | .13   |
| Other                                                                                                                              | 349              | 2.88 | 0.80 |       |
| Was the survey hard to complete?                                                                                                   |                  |      |      |       |
| Yes                                                                                                                                | 41               | 2.56 | 0.86 | .02   |
| No                                                                                                                                 | 1057             | 2.84 | 0.76 |       |
| Do you have a single doctor or practice that you would say handles most of your care?                                              |                  |      |      |       |
| Yes                                                                                                                                | 907              | 2.93 | 0.71 | .0001 |
| No                                                                                                                                 | 191              | 2.35 | 0.84 |       |
| If your doctor or practice received the answers to these questions, would it help them to understand how you feel about your care? |                  |      |      |       |

|                          |     |      |      |       |
|--------------------------|-----|------|------|-------|
| Yes                      | 670 | 3.00 | 0.72 | .0001 |
| No                       | 428 | 2.57 | 0.77 |       |
| Region                   |     |      |      |       |
| Northeast                | 221 | 2.78 | 0.78 | .55   |
| Midwest                  | 285 | 2.87 | 0.77 |       |
| South                    | 306 | 2.82 | 0.79 |       |
| West                     | 213 | 2.79 | 0.75 |       |
| Patient Enablement Index |     |      |      |       |
| 0                        | 230 | 1.98 | 0.59 | .0001 |
| 1-5                      | 288 | 2.55 | 0.60 |       |
| 6-11                     | 395 | 3.12 | 0.50 |       |
| 12                       | 197 | 3.65 | 0.35 |       |

**Figure 1B: Scree test for online (cross-validation) sample 2 (n= 1089)**

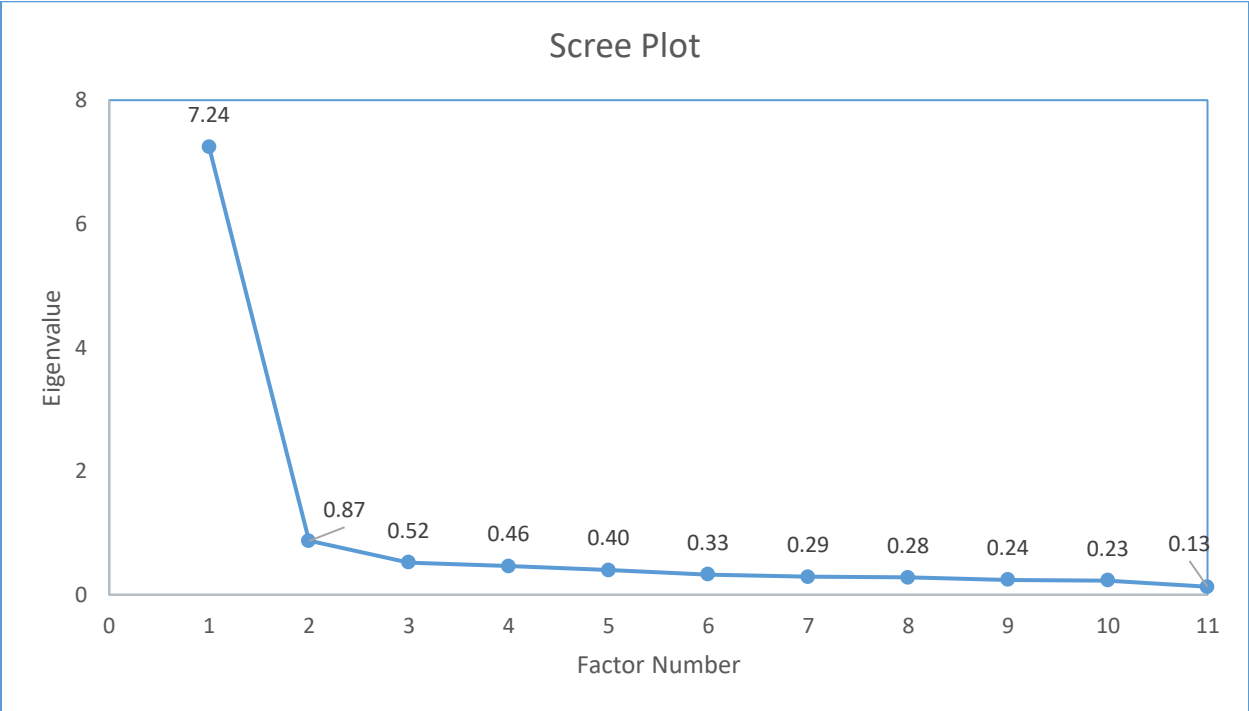



Figure 2B: Distribution of scores in online sample 1 (n=1140)

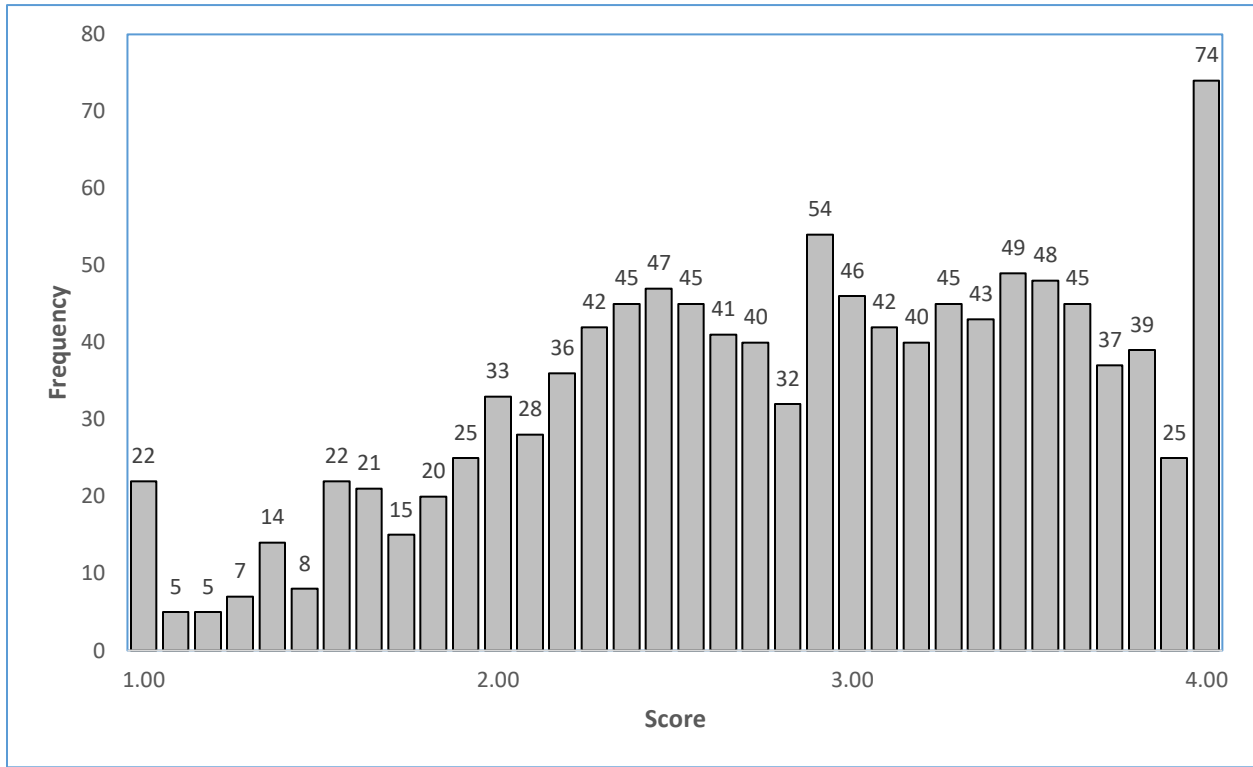

**Figure 3B: Rasch Model item-person map for online sample 1 (n= 1140)**

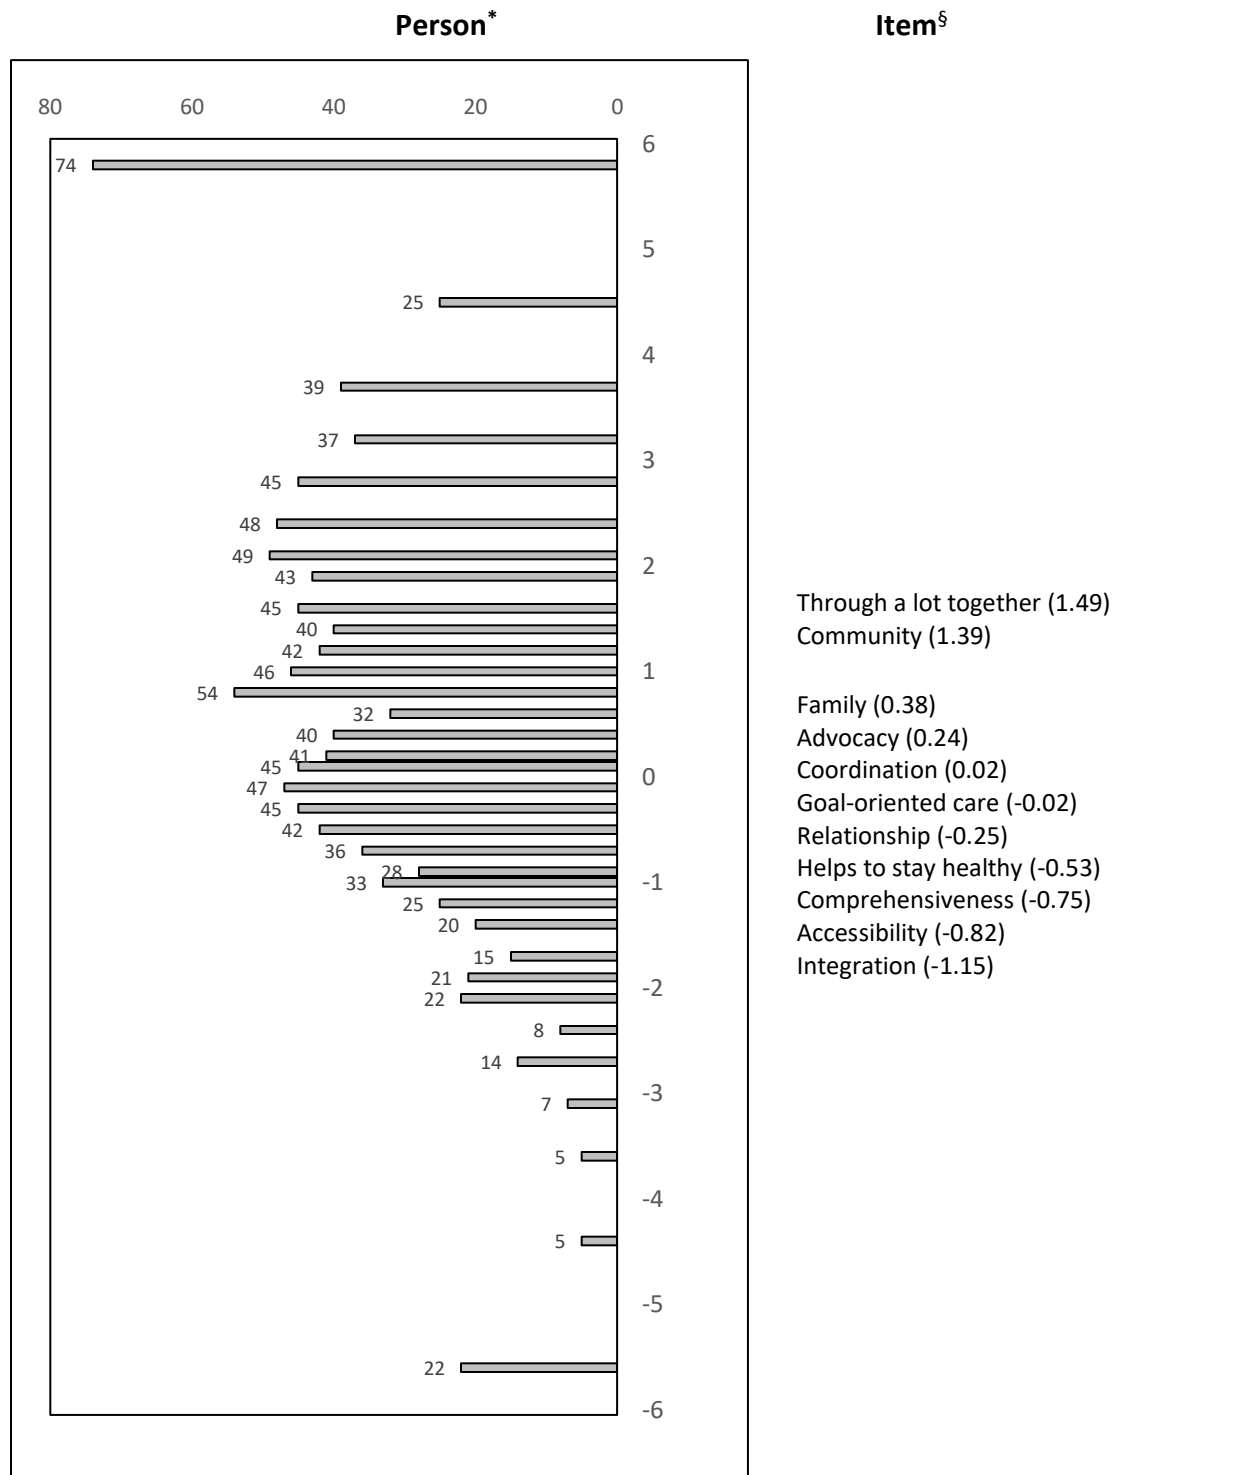

\* Bars under *Person* heading show distribution of person’s responses across the range of difficulty of the items.  
 § Numbers in parentheses after each *Item* heading show distribution and lack of redundancy of items across the range of difficulty.

Not pictured: On *Person* side of map, mean = 0.68, 1 standard deviation = 1.71; on the *Item* side of the map, mean = 0.0, 1 standard deviation = 0.81

**Table 5B: Participant characteristics for each of three clinical sub-samples**

| <b>Participant Characteristic</b> | <b>2 Private Family<br/>Medicine Practices<br/>N= 126</b> | <b>Community Health<br/>Center<br/>N = 97</b> | <b>Pediatric Practice<br/>N = 100</b> |
|-----------------------------------|-----------------------------------------------------------|-----------------------------------------------|---------------------------------------|
| <b>Age</b>                        | <u>N (%)</u>                                              | <u>N (%)</u>                                  | <u>N (%)</u>                          |
| 18-29                             | 15 (22)                                                   |                                               |                                       |
| 30-44                             | 31 (41)                                                   | ***                                           | ***                                   |
| 45-60                             | 52 (25)                                                   |                                               |                                       |
| > 60                              | 28 (12)                                                   |                                               |                                       |
| <b>Gender (Female)</b>            | 88 (70)                                                   | ***                                           | 69 (69)                               |
| <b>Years knowing physician</b>    |                                                           |                                               |                                       |
| <1                                | 28 (22)                                                   | 6 (7)                                         |                                       |
| 1-3                               | 52 (41)                                                   | 21 (23)                                       | ***                                   |
| 4-10                              | 31 (25)                                                   | 33 (37)                                       |                                       |
| >10                               | 15 (12)                                                   | 30 (33)                                       |                                       |
| <b>WMI</b>                        |                                                           |                                               |                                       |
| 0                                 | 43 (39)                                                   | ***                                           | 62 (69)                               |
| 1                                 | 32 (29)                                                   |                                               | 22 (24)                               |
| ≥ 2                               | 35 (32)                                                   |                                               | 6 (7)                                 |
| <b>Patient Enablement Index</b>   |                                                           |                                               |                                       |
| 0                                 | 8 (6)                                                     | 15 (17)                                       |                                       |
| 1-5                               | 15 (12)                                                   | 13 (15)                                       | ***                                   |
| 6-11                              | 50 (41)                                                   | 31 (34)                                       |                                       |
| 12                                | 50 (41)                                                   | 31 (34)                                       |                                       |

\*\*\* Item not included on this version of the survey

**Table 6B: Items, descriptions, factor loading and goodness of fit statistic for clinical sub-samples**

| Item                                                                            | 2 Private Family Medicine Practices<br>N= 126 |     |                |                        | Community Health Center<br>N = 97 |     |                |                        | Pediatric Practice<br>N = 100 |     |                |                        |
|---------------------------------------------------------------------------------|-----------------------------------------------|-----|----------------|------------------------|-----------------------------------|-----|----------------|------------------------|-------------------------------|-----|----------------|------------------------|
|                                                                                 | Mean                                          | SD  | Factor Loading | Item-Total Correlation | Mean                              | SD  | Factor Loading | Item-Total Correlation | Mean                          | SD  | Factor Loading | Item-Total Correlation |
| My practice makes it easy for me to get care.                                   | 3.72                                          | .57 | .68            | .59                    | 3.68                              | .67 | .75            | .70                    | 3.73                          | .52 | .31            | .27                    |
| My practice is able to provide most of my care.                                 | 3.75                                          | .52 | .73            | .67                    | 3.70                              | .63 | .72            | .65                    | 3.88                          | .33 | .63            | .54                    |
| In caring for me, my doctor considers all of the factors that affect my health. | 3.79                                          | .50 | .69            | .56                    | 3.77                              | .62 | .79            | .69                    | 3.88                          | .36 | .48            | .41                    |
| My practice coordinates the care I get from multiple places.                    | 3.57                                          | .62 | .62            | .56                    | 3.53                              | .75 | .40            | .40                    | 3.71                          | .57 | .52            | .44                    |
| My doctor or practice knows me as a person.                                     | 3.63                                          | .71 | .47            | .44                    | 3.44                              | .85 | .74            | .76                    | 3.51                          | .84 | .47            | .45                    |
| My doctor and I have been through a lot together.                               | 3.02                                          | 1.2 | .44            | .41                    | 2.74                              | 1.1 | .60            | .61                    | 2.69                          | 1.1 | .44            | .45                    |
| My doctor or practice stands up for me.                                         | 3.58                                          | .68 | .76            | .69                    | 3.43                              | .89 | .86            | .86                    | 3.44                          | .77 | .66            | .58                    |
| The care I get takes into account knowledge of my family.                       | 3.52                                          | .76 | .54            | .49                    | 3.44                              | .89 | .76            | .71                    | 3.63                          | .61 | .73            | .63                    |
| The care I get in this practice is informed by knowledge of my community.       | 3.29                                          | .88 | .53            | .46                    | 3.00                              | 1.0 | .70            | .66                    | 3.27                          | .91 | .58            | .52                    |
| Over time, this practice helps me to meet my goals.                             | 3.64                                          | .64 | .80            | .72                    | 3.60                              | .71 | .80            | .77                    | 3.72                          | .54 | .47            | .38                    |
| Over time, my practice helps me stay healthy.                                   | 3.71                                          | .57 | .88            | .79                    | 3.49                              | .71 | .79            | .76                    | 3.81                          | .45 | .48            | .41                    |

**Table 7B: Concurrent validity analyses for clinical sub-samples**

| Validation Item          | 2 Private Family Medicine Practices<br>n= 126 |      |      |       | Community Health Center<br>n= 97 |      |      |       | Pediatric Practice<br>n= 100 |      |      |     |
|--------------------------|-----------------------------------------------|------|------|-------|----------------------------------|------|------|-------|------------------------------|------|------|-----|
|                          | N                                             | Mean | S.D. | P     | N                                | Mean | S.D. | P     | N                            | Mean | S.D. | P   |
| Age                      |                                               |      |      |       |                                  |      |      |       |                              |      |      |     |
| 18-29                    | 15                                            | 3.54 | .45  |       |                                  |      |      |       |                              |      |      |     |
| 30-44                    | 31                                            | 3.41 | .48  | .17   | ***                              | ***  | ***  | ***   | ***                          | ***  | ***  | *** |
| 45-60                    | 52                                            | 3.60 | .46  |       |                                  |      |      |       |                              |      |      |     |
| > 60                     | 28                                            | 3.67 | .44  |       |                                  |      |      |       |                              |      |      |     |
| Female                   |                                               |      |      |       |                                  |      |      |       |                              |      |      |     |
| Yes                      | 88                                            | 3.58 | .48  | .64   | ***                              | ***  | ***  | ***   | 69                           | 3.55 | .42  | .65 |
| No                       | 38                                            | 3.54 | .43  |       |                                  |      |      |       | 31                           | 3.59 | .31  |     |
| Years knowing physician  |                                               |      |      |       |                                  |      |      |       |                              |      |      |     |
| <1                       | 18                                            | 3.51 | .50  |       | 6                                | 2.97 | .63  | .01   |                              |      |      |     |
| 1-3                      | 53                                            | 3.59 | .45  | .93   | 21                               | 3.38 | .42  |       | ***                          | ***  | ***  | *** |
| 4-10                     | 41                                            | 3.59 | .44  |       | 33                               | 3.42 | .65  |       |                              |      |      |     |
| >10                      | 8                                             | 3.44 | .64  |       | 30                               | 3.72 | .43  |       |                              |      |      |     |
| WMI                      |                                               |      |      |       |                                  |      |      |       |                              |      |      |     |
| 0                        | 43                                            | 3.60 | .35  |       |                                  |      |      |       | 62                           | 3.63 | .30  |     |
| 1                        | 32                                            | 3.55 | .47  | .83   | ***                              | ***  | ***  | ***   | 22                           | 3.36 | .51  | .02 |
| ≥ 2                      | 35                                            | 3.61 | .52  |       |                                  |      |      |       | 6                            | 3.64 | .47  |     |
| Patient Enablement Index |                                               |      |      |       |                                  |      |      |       |                              |      |      |     |
| 0                        | 8                                             | 2.94 | .65  |       | 15                               | 3.09 | .83  |       |                              |      |      |     |
| 1-5                      | 15                                            | 3.38 | .56  | .0001 | 13                               | 3.11 | .59  | .0001 | ***                          | ***  | ***  | *** |
| 6-11                     | 50                                            | 3.51 | .42  |       | 31                               | 3.49 | .47  |       |                              |      |      |     |
| 12                       | 50                                            | 3.78 | .29  |       | 31                               | 3.77 | .33  |       |                              |      |      |     |

\*\*\*Item not included in this version of the survey

**Figure 4B: Distribution of scores in two private practices (n= 126)**

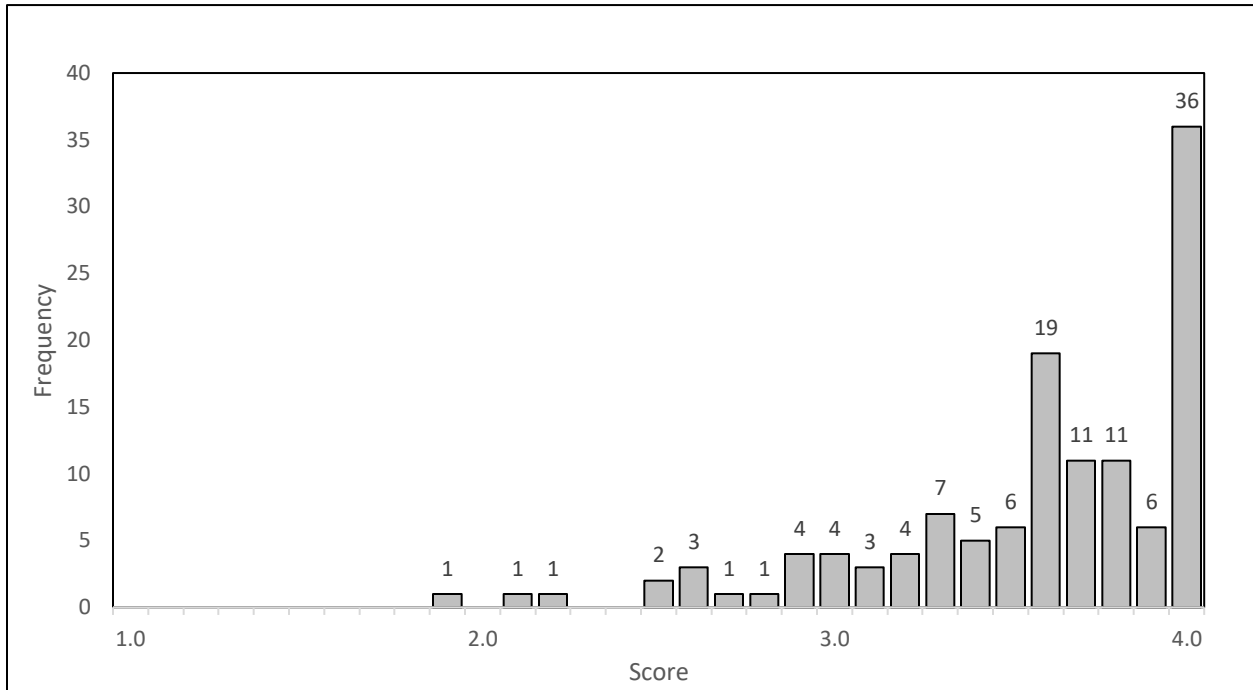

**Figure 5B: Distribution of scores in community health center (n= 97)**

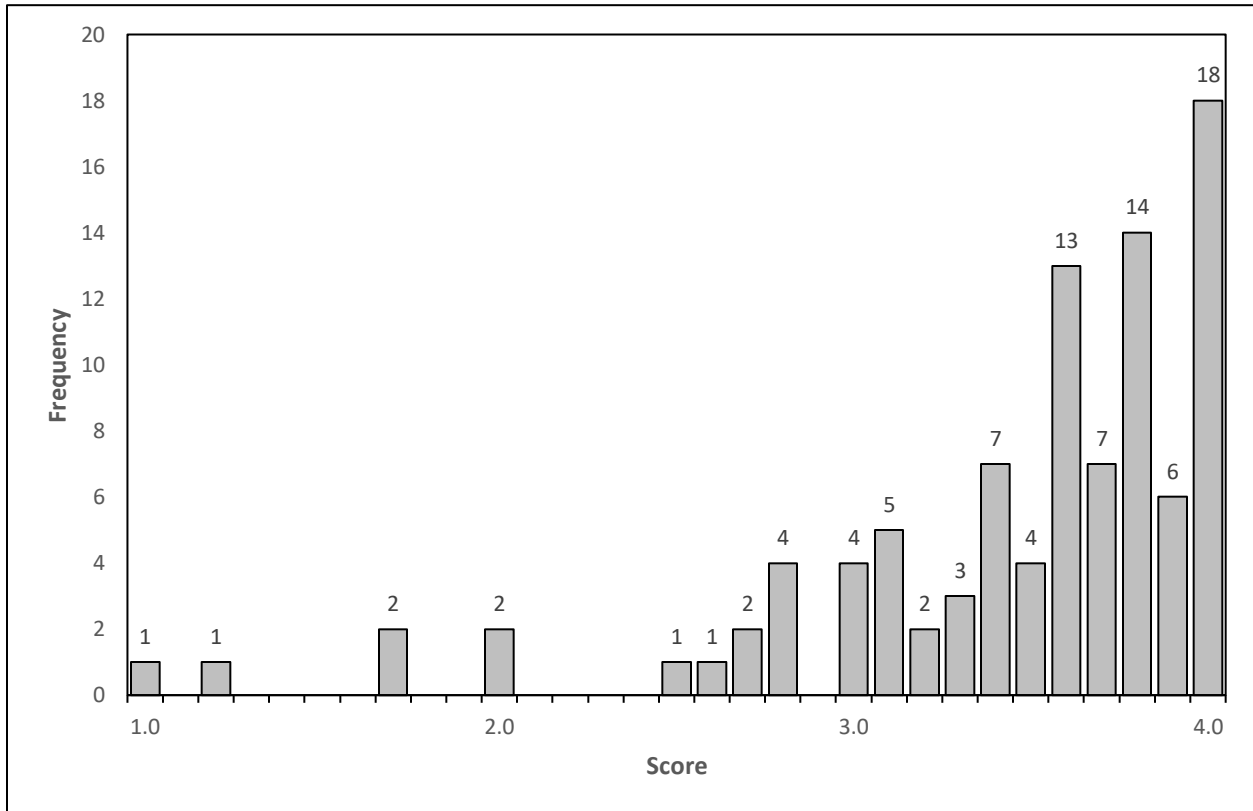

Figure 6B: Distribution of scores in pediatric practice (n= 100)

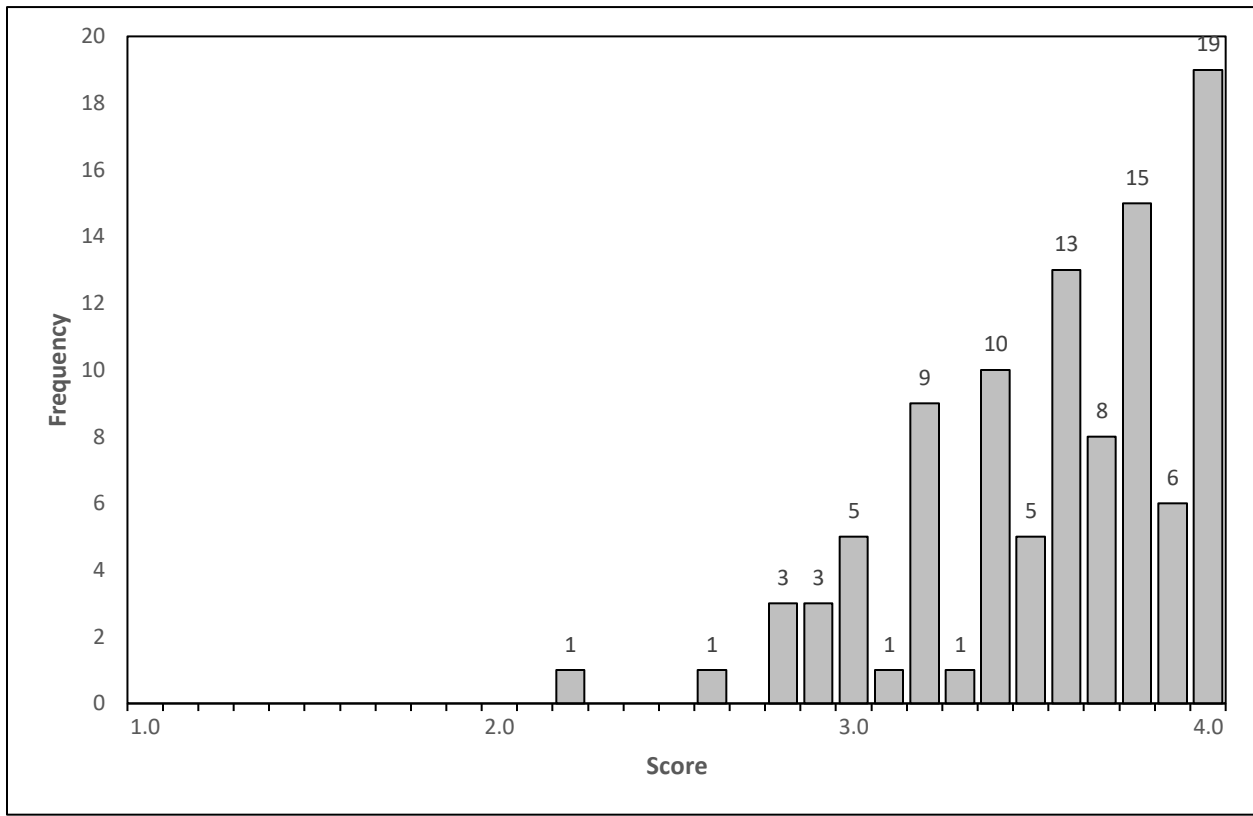



**Figure 7B: Rasch Model item-person map in two private practices (n= 126)**

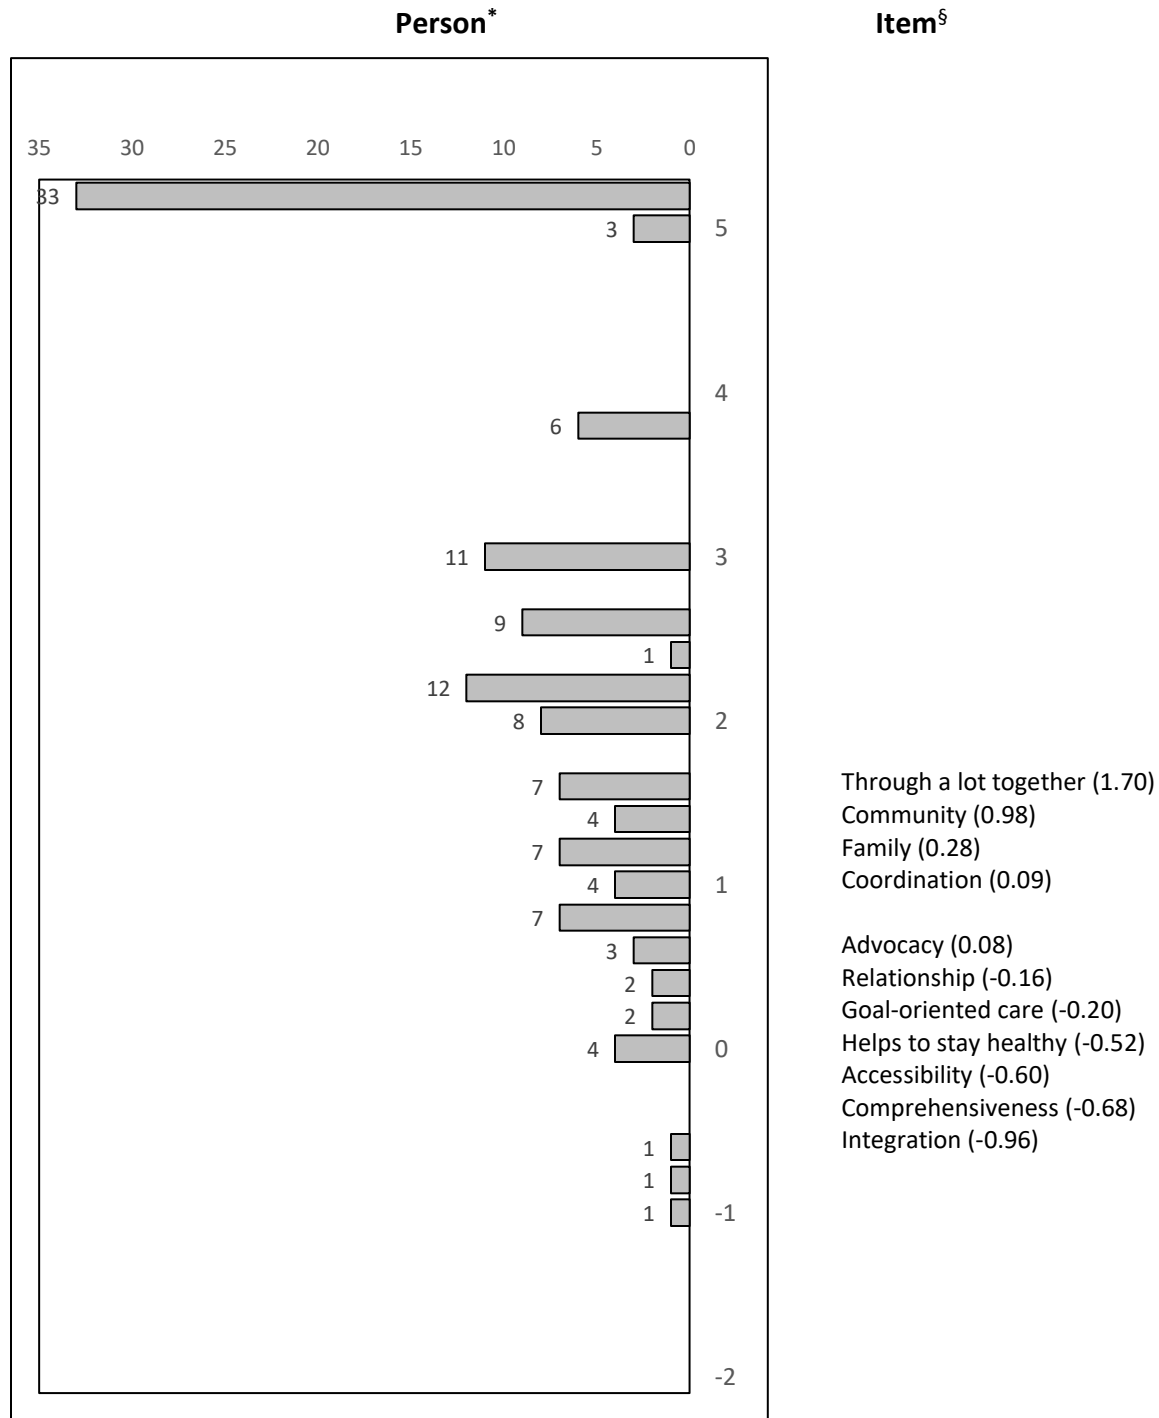

\* Bars under *Person* heading show distribution of person's responses across the range of difficulty of the items.

§ Numbers in parentheses after each *Item* heading show distribution and lack of redundancy of items across the range of difficulty.

Not pictured: On *Person* side of map, mean = 1.84, 1 standard deviation = 1.12; on the *Item* side of the map, mean = 0.0, 1 standard deviation = 0.74

Figure 8B: Rasch Model in community health center (n= 99)

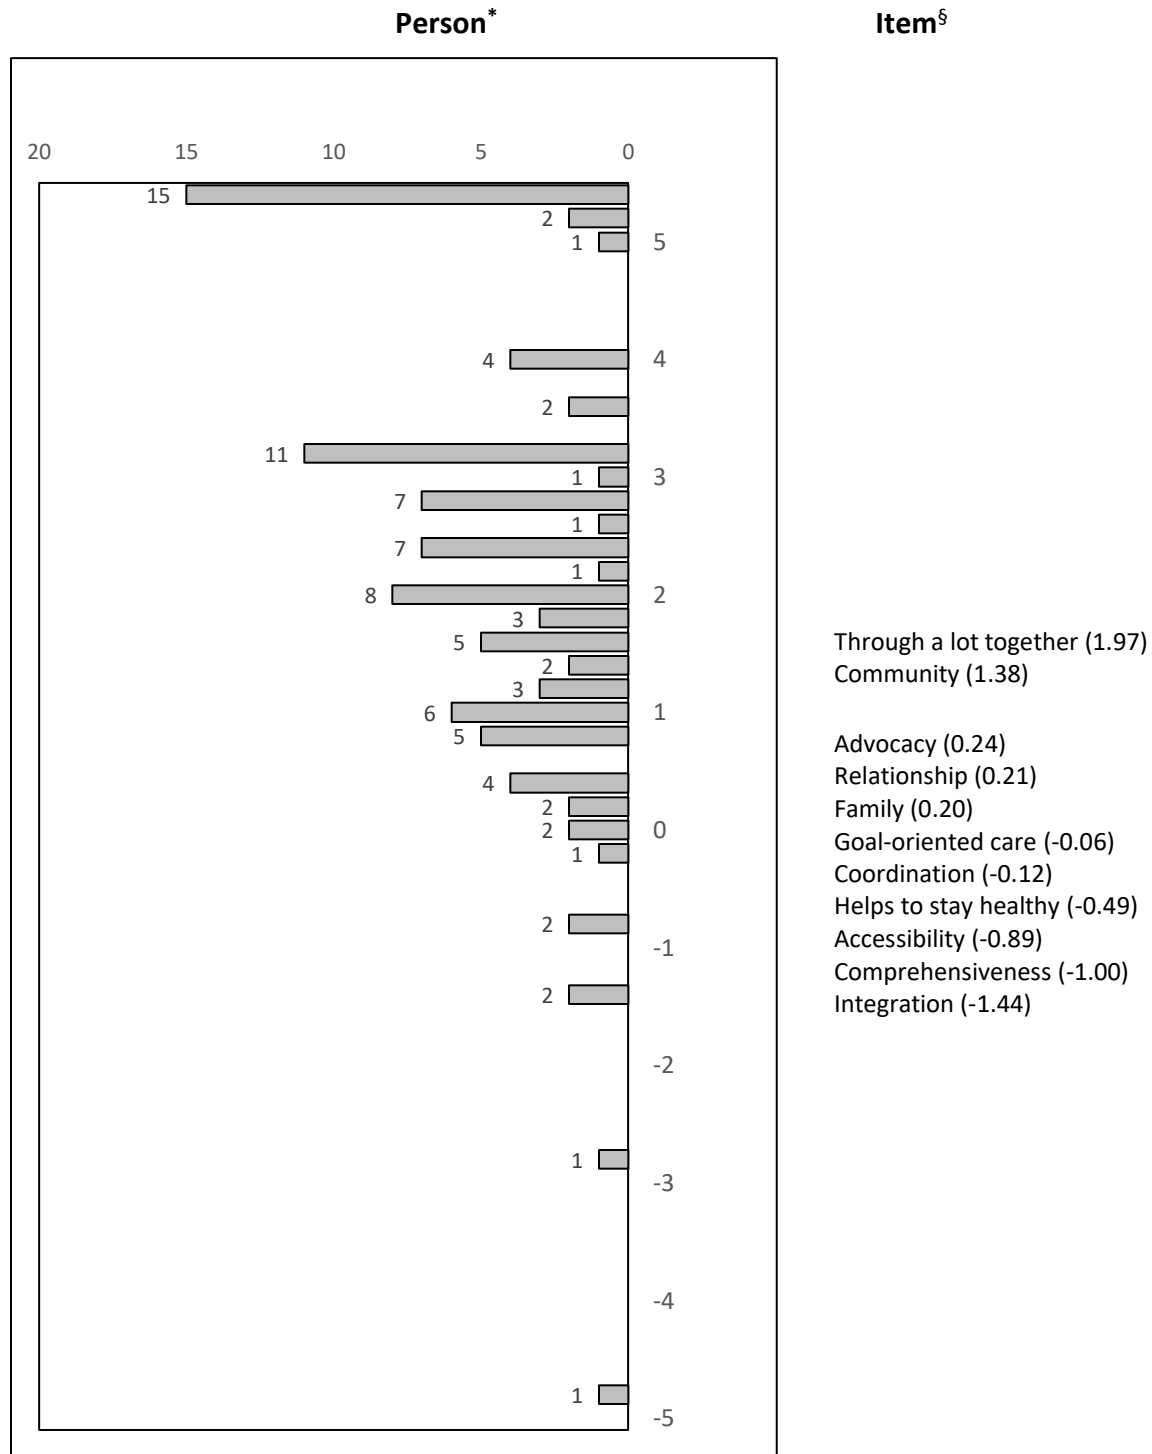

\* Bars under *Person* heading show distribution of person’s responses across the range of difficulty of the items.

§ Numbers in parentheses after each *Item* heading show distribution and lack of redundancy of items across the range of difficulty.

Not pictured: On *Person* side of map, mean = 1.81, 1 standard deviation = 1.37; on the *Item* side of the map, mean = 0.0, 1 standard deviation = 0.96

**Figure 9B: Rasch Model in pediatric practice (n= 100)**

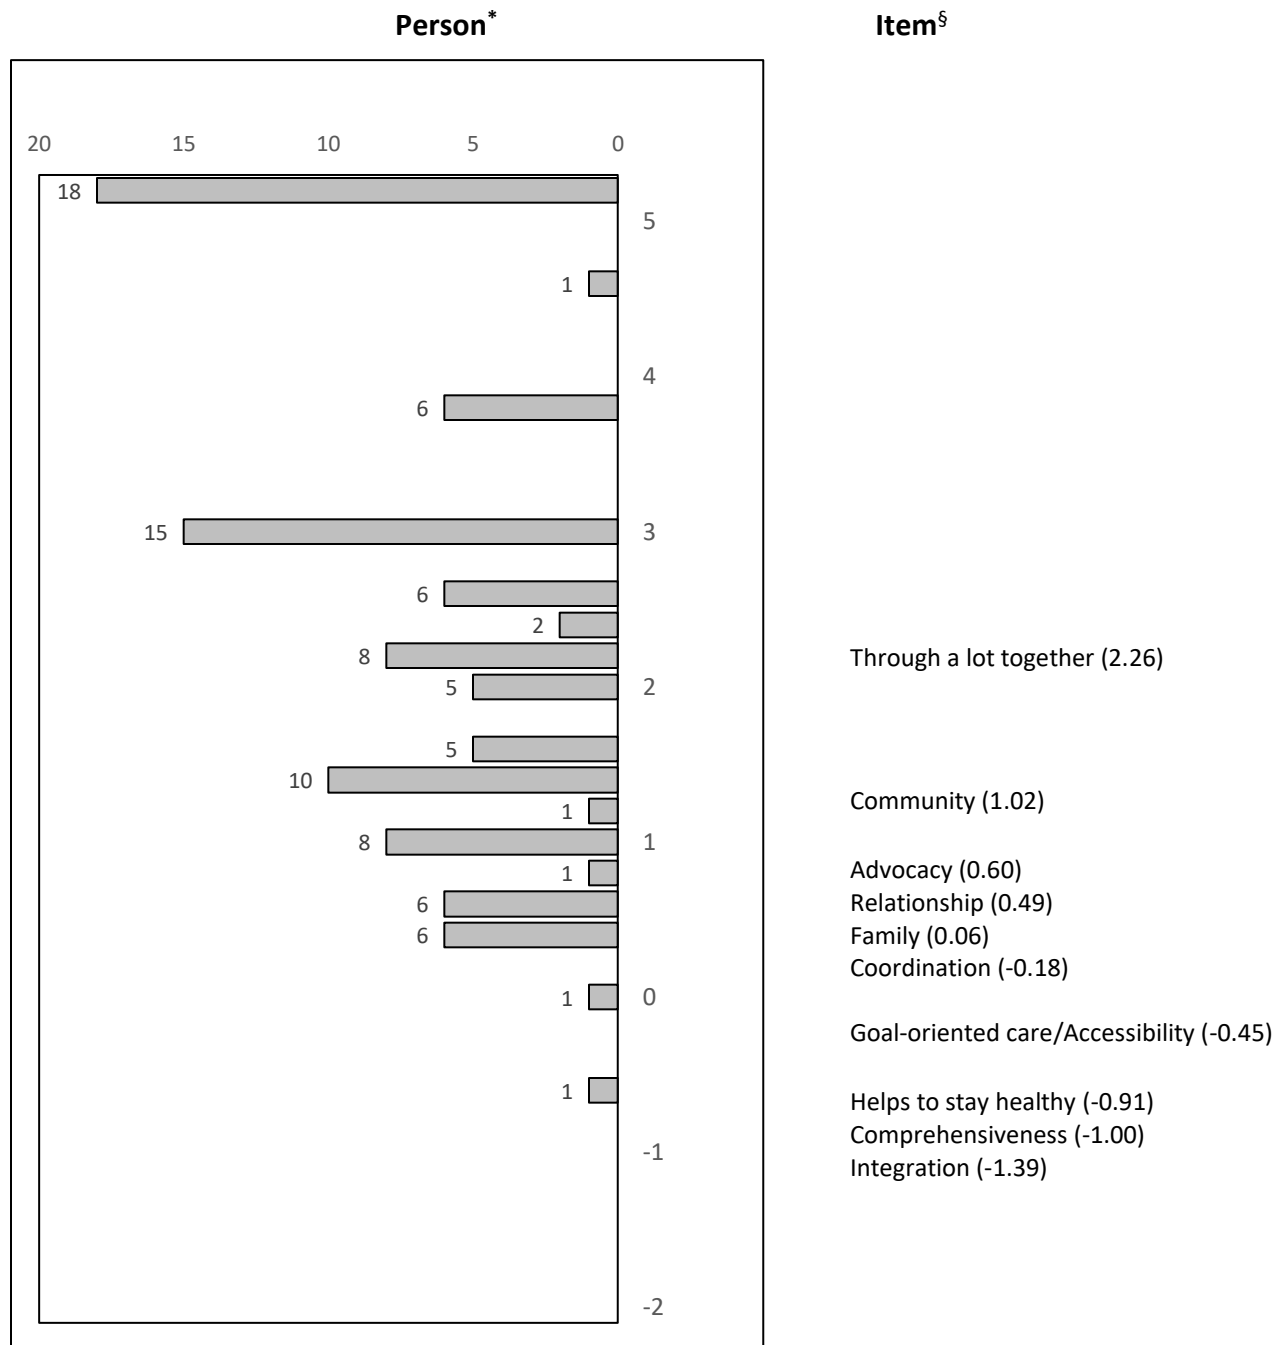

\* Bars under *Person* heading show distribution of person’s responses across the range of difficulty of the items.

§ Numbers in parentheses after each *Item* heading show distribution and lack of redundancy of items across the range of difficulty.

Not pictured: On *Person* side of map, mean = 1.97, 1 standard deviation = 1.07; on the *Item* side of the map, mean = 0.0, 1 standard deviation = 1.00
